# Supplementary material for: Fe(II) Addition Drives Soil Bacterial Co-Ocurrence Patterns and Functions Mediated by Anaerobic and Chemoautotrophic Taxa
Source: MDPI journal article supplement (doi:10.3390/microorganisms10030547), 2022-03-02
Supplement: s1 [file s1]

## SUPPLEMENT

**Table S1**

Soil physicochemical properties in different Fe(II) treatments. Total reduced substances (TRS), Fe(II), Soil organic matter (SOM), pH and Eh5 were determined and cited from our previous studies[26]. The total nitrogen (TN), Available phosphorus (TP), Available potassium(AK), and total potassium(AK) were further determined with the same soil treatments.

| Treatments | TN<br>(g/kg) | AP<br>(g/kg) | TK<br>(g/kg) | AK<br>(mg/kg) | SOM<br>(g/kg) | TRS<br>(cmol/kg) | Fe ( II )<br>(g/kg) | Eh5     | pH          |
|------------|--------------|--------------|--------------|---------------|---------------|------------------|---------------------|---------|-------------|
| LCK        | 1.68±0.02    | 0.65±0.05    | 12.49±0.52   | 222.69±30b    | 13.29±0.43    | 4.51±0.60b       | 194±30b             | 543±18a | 6.04±0.75a  |
| LL         | 1.69±0.03    | 0.71±0.03    | 12.51±0.24   | 226.49±30b    | 14.12±0.31    | 4.81±0.26b       | 235±16b             | 400±51b | 5.14±0.54b  |
| LH         | 1.60±0.11    | 0.67±0.03    | 11.88±0.24   | 239.20±30b    | 13.28±0.50    | 8.81±0.82a       | 580±110a            | 231±38c | 3.95±1.19b  |
| SCK        | 1.00±0.03    | 0.49±0.02    | 6.50±0.36    | 55.51±30b     | 7.87±0.20     | 1.11±0.31b       | 18±6b               | 529±18a | 5.54±0.68a  |
| SL         | 0.99±0.05    | 0.50±0.02    | 6.57±0.31    | 53.16±30b     | 8.49±0.33     | 1.58±0.21b       | 70±1b               | 245±6b  | 4.37±0.08ab |
| SH         | 0.98±0.04    | 0.48±0.02    | 6.47±0.46    | 52.16±30b     | 7.85±0.33     | 8.01±0.47a       | 555±46a             | 120±21c | 3.23±0.77b  |

Note: Values are means ± standard deviation, different soil treatments (n=3). Means followed by a different letter for a given factor are significantly different in same soil texture (P < 0.05; Analysis of ANOVA).

**Table S2.**

Soil Bacterial Abundance and  $\alpha$ -diversity in soil samples.

| Treatments | Reads | OTUs | Coverage | Richness indices      |                       | Diversity indices      |                            | Soil Bacterial Abundance |
|------------|-------|------|----------|-----------------------|-----------------------|------------------------|----------------------------|--------------------------|
|            |       |      |          | Chao                  | ACE                   | Shannon                | Simpson                    | 16S rRNA genes(copies/g) |
| LCK        | 31536 | 2751 | 0.9792   | 2725±62 <sup>a</sup>  | 2728±47 <sup>a</sup>  | 6.10±0.04 <sup>a</sup> | 0.0066±0.0006 <sup>b</sup> | 2.82E+11 <sup>a</sup>    |
| LL         | 36812 | 2790 | 0.9827   | 2725±72 <sup>a</sup>  | 2734±54 <sup>a</sup>  | 5.93±0.09 <sup>a</sup> | 0.0090±0.0013 <sup>b</sup> | 2.71E+11 <sup>ab</sup>   |
| LH         | 38430 | 2625 | 0.9839   | 2575±130 <sup>a</sup> | 2576±94 <sup>a</sup>  | 5.33±0.08 <sup>b</sup> | 0.0226±0.0032 <sup>a</sup> | 1.44E+11 <sup>b</sup>    |
| SCK        | 34144 | 2609 | 0.9833   | 2479±47 <sup>A</sup>  | 2454±105 <sup>A</sup> | 5.82±0.08 <sup>A</sup> | 0.0113±0.0024 <sup>B</sup> | 1.61E+11 <sup>A</sup>    |
| SL         | 32101 | 2299 | 0.9825   | 2132±107 <sup>B</sup> | 2174±132 <sup>A</sup> | 5.04±0.21 <sup>B</sup> | 0.0289±0.0071 <sup>A</sup> | 1.40E+11 <sup>AB</sup>   |
| SH         | 39909 | 2533 | 0.9851   | 2401±87 <sup>AB</sup> | 2442±99 <sup>A</sup>  | 4.97±0.07 <sup>B</sup> | 0.0368±0.0030 <sup>A</sup> | 1.15E+11 <sup>B</sup>    |

Note: All values are mean ± standard deviation in different soil treatments. Columns in the same soil type with different letters were significantly different according to an ANOVA analysis (P<0.05, n=3).

**Table S3.**

The members of Anaerobic bacteria genera observed in in paddy soils.

| Genus                     | LCK    | LL     | LH     | SCK    | SL     | SH     |
|---------------------------|--------|--------|--------|--------|--------|--------|
| <i>Alicyclobacillus</i>   | 0.0002 | 0.0040 | 0.0112 | 0.0012 | 0.0820 | 0.1693 |
| <i>Halomonas</i>          | 0.0041 | 0.0050 | 0.0013 | 0.0219 | 0.0490 | 0.0783 |
| <i>Holophaga</i>          | 0.0410 | 0.0158 | 0.0102 | 0.0350 | 0.0163 | 0.0174 |
| <i>Cellulomonas</i>       | 0.0016 | 0.0080 | 0.0869 | 0.0000 | 0.0126 | 0.0035 |
| <i>Desulfitobacterium</i> | 0.0016 | 0.0021 | 0.0084 | 0.0005 | 0.0271 | 0.0550 |
| <i>Desulfosporosinus</i>  | 0.0002 | 0.0046 | 0.0503 | 0.0007 | 0.0162 | 0.0012 |
| <i>Anaeromyxobacter</i>   | 0.0436 | 0.0155 | 0.0040 | 0.0074 | 0.0020 | 0.0030 |
| total                     | 0.0923 | 0.0551 | 0.1722 | 0.0667 | 0.2053 | 0.3277 |

**Table S4.**

The members of Chemoautotrophic bacteria genera observed in in paddy soils.

| Genus                    | LCK    | LL     | LH     | SCK    | SL     | SH     |
|--------------------------|--------|--------|--------|--------|--------|--------|
| <i>Alicyclobacillus</i>  | 0.0016 | 0.0075 | 0.0869 | 0.0012 | 0.0820 | 0.1693 |
| <i>Leptolyngbya</i>      | 0.0016 | 0.0022 | 0.0084 | 0.0025 | 0.0006 | 0.0016 |
| <i>Nitrosovibrio</i>     | 0.0311 | 0.0363 | 0.0452 | 0.0285 | 0.0140 | 0.0174 |
| <i>Desulfosporosinus</i> | 0.0034 | 0.0118 | 0.0006 | 0.0007 | 0.0162 | 0.0012 |
| total                    | 0.0377 | 0.0578 | 0.1410 | 0.0328 | 0.1129 | 0.1895 |

**Table S5.**

Mantel test showing the correlations between soil properties and the community composition of bacteria in sandy soils.

| Environmental Factor | r <sup>2</sup> | Pr(>r) |
|----------------------|----------------|--------|
| pH                   | 0.1814         | 0.019  |
| Eh5                  | 0.4313         | 0.001  |
| TRS                  | 0.2406         | 0.015  |
| AP                   | 0.3573         | 0.003  |
| AK                   | 0.541          | 0.008  |
| TK                   | 0.203          | 0.253  |
| TN                   | 0.43           | 0.002  |
| SOM                  | 0.4118         | 0.001  |
| Fe                   | 0.1535         | 0.028  |

**Table S6.**

Topological properties of of Correlation network diagram of soil bacterial communities at genus level in soil systems with different Fe (II) concentrations.

| Parameters                         | LSCK            | LSL             | LSH             |
|------------------------------------|-----------------|-----------------|-----------------|
| nodes                              | 26              | 23              | 26              |
| Total links                        | 66              | 78              | 77              |
| Positive links                     | 29              | 42              | 47              |
| Negative links                     | 37              | 36              | 30              |
| Clustering coefficient             | 0.412           | 0.563           | 0.569           |
| Network density                    | 0.203           | 0.308           | 0.298           |
| Shortest paths                     | 650(100%)       | 422(83%)        | 466(71%)        |
| Network diameter                   | 7               | 4               | 4               |
| Average neighbors                  | 5.077           | 6.783           | 6.578           |
| Links of Anaerobic bacteria        | 46(Positive:23) | 50(Positive:30) | 42(Positive:24) |
| Links of Chemoautotrophic bacteria | 20(Positive:9)  | 24(Positive:13) | 28(Positive:20) |

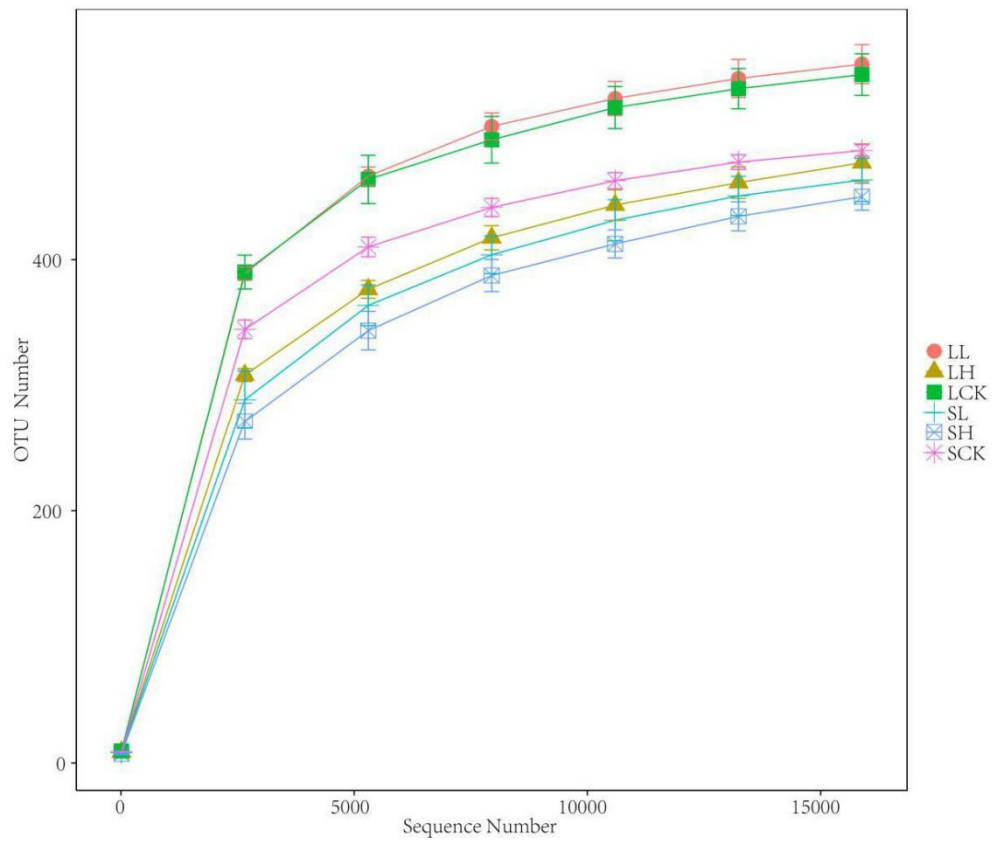

**Fig S1.** Rarefaction curves for 16S rRNA gene diversity. Curves are coloured according to soil treatments.
